# Supplementary material for: Perspectives of Positively Charged Nanocrystals of Tedizolid Phosphate as a Topical Ocular Application in Rabbits
Source: MDPI journal article supplement (doi:10.3390/molecules27144619), 2022-07-20
Supplement: s1 [file s1]

## Supplementary Data

### Perspectives of Positively Charged Nanocrystals of Tedizolid Phosphate as Topical Ocular Application in Rabbits

Abdullah Alshememry <sup>1#</sup>, Musaed Alkholief <sup>1#</sup>, Mohd Abul Kalam <sup>1</sup>, Mohammad Raish <sup>1</sup>, Raisuddin Ali <sup>1</sup>, Sulaiman S. Alhudaithi <sup>1</sup>, Muzaffar Iqbal <sup>2</sup> and Aws Alshamsan <sup>1,\*</sup>

<sup>1</sup> Department of Pharmaceutics, College of Pharmacy, King Saud University, Riyadh 11451, Saudi Arabia; makalam@ksu.edu.sa (M.A.K); mraish@ksu.edu.sa (M.R); ramohammad@ksu.edu.sa (R.A) aalshememry@ksu.edu.sa (A.A); malkholief@ksu.edu.sa (M.A)

<sup>2</sup> Department of Pharmaceutical Chemistry, College of Pharmacy, King Saud University, Riyadh 11451, Saudi Arabia; muziqbal@ksu.edu.sa [\(M.I\)](#)

\* Correspondence: aalshamsan@ksu.edu.sa

# These authors contributed equally to this work.

## Supplementary Tables

**Table S1: Grading system for ocular irritation test**

| Cornea                                                                                                                                                                                  |                        |           |
|-----------------------------------------------------------------------------------------------------------------------------------------------------------------------------------------|------------------------|-----------|
| Lesion                                                                                                                                                                                  |                        | Score     |
| <b>a. Opacity-Degree of density (area which is most dense is taken for reading)</b>                                                                                                     |                        |           |
| No ulceration or opacity                                                                                                                                                                |                        | 0         |
| Scattered or diffuse area – details of iris clearly visible                                                                                                                             |                        | 1         |
| Easily discernible translucent areas, details of iris slightly obscured                                                                                                                 |                        | 2         |
| Opalescent areas, no details of iris visible, size of pupil barely discernible                                                                                                          |                        | 3         |
| Opaque, iris invisible                                                                                                                                                                  |                        | 4         |
| <b>b. Area of cornea involved</b>                                                                                                                                                       |                        |           |
| One quarter (or less) but not zero                                                                                                                                                      |                        | 1         |
| Greater than one quarter but less than one half                                                                                                                                         |                        | 2         |
| Greater than one half but less than three quarters                                                                                                                                      |                        | 3         |
| Greater than three quarters up to whole area                                                                                                                                            |                        | 4         |
| <b>Score equals (a x b x 5):</b>                                                                                                                                                        | <b>Total maximum =</b> | <b>80</b> |
| Iris                                                                                                                                                                                    |                        |           |
| Lesion                                                                                                                                                                                  |                        | Score     |
| <b>a. Values</b>                                                                                                                                                                        |                        |           |
| Normal                                                                                                                                                                                  |                        | 0         |
| Folds above normal, congestion, swelling, circumcorneal injection (any one or all of these or combination of any thereof), iris still reacting to light (sluggish reaction is positive) |                        | 1         |
| No reaction to light, hemorrhage; gross destruction (any one/ all of these)                                                                                                             |                        | 2         |
| <b>Score equals (a x 5):</b>                                                                                                                                                            | <b>Total maximum =</b> | <b>10</b> |
| Conjunctiva                                                                                                                                                                             |                        |           |
| Lesion                                                                                                                                                                                  |                        | Score     |
| <b>a. Redness (refers to palpebral conjunctiva only)</b>                                                                                                                                |                        |           |
| Vessels normal                                                                                                                                                                          |                        | 0         |
| Vessels definitely injected above normal                                                                                                                                                |                        | 1         |
| More diffuse, deeper crimson red, individual vessels not easily discernible                                                                                                             |                        | 2         |
| Diffuse beefy red                                                                                                                                                                       |                        | 3         |
| <b>b. Chemosis</b>                                                                                                                                                                      |                        |           |
| No swelling                                                                                                                                                                             |                        | 0         |
| Any swelling above normal (includes nictitating membrane)                                                                                                                               |                        | 1         |
| Obvious swelling with partial eversion of the lids                                                                                                                                      |                        | 2         |
| Swelling with lids about half closed                                                                                                                                                    |                        | 3         |
| Swelling with lids about half closed to completely closed                                                                                                                               |                        | 4         |
| <b>c. Discharge</b>                                                                                                                                                                     |                        |           |
| No any discharge                                                                                                                                                                        |                        | 0         |
| Any amount different from normal (does not include small amount observed in inner canthus of normal animals)                                                                            |                        | 1         |
| Discharge with moistening of the lids and hairs just adjacent to the lids                                                                                                               |                        | 2         |
| Discharge with moistening of the lids and considerable area around the eye                                                                                                              |                        | 3         |
| <b>Score equals (a + b + c) x 2:</b>                                                                                                                                                    | <b>Total maximum =</b> | <b>20</b> |

**Table S2: Classification of eye irritation scoring system**

| <b>Classification of Irritation</b> | <b>Maximum Mean Total Score (MMTS*)</b> |
|-------------------------------------|-----------------------------------------|
| None                                | 0.0-0.5                                 |
| Practically none                    | 0.6-2.5                                 |
| Minimally                           | 2.6-15.0                                |
| Mildly                              | 15.1-25.0                               |
| Moderately                          | 25.1-50.0                               |
| Severely                            | 50.1-80.0                               |
| Extremely                           | 80.1-100.0                              |
| Maximally                           | 100.1-110.0                             |

**Figure S1**

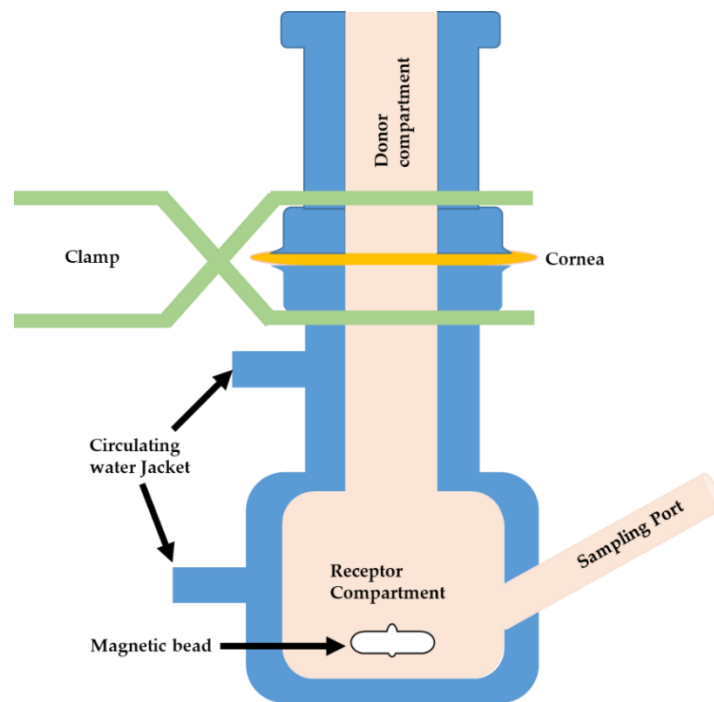

**Figure S1: Schematic representation of Franz Diffusion cell**
